# Supplementary material
Source: Research Square preprint supplement (doi:10.21203/rs.3.rs-9072534/v1)
Supplement: Supplementary file 1 [file dfe4b400ac753df4b15a4438.docx]

**Table 1: Phytosociological status of plants species found at less planted area of Basapura forest**

| **Sl No** | **Plant Name (vernacular name/Local Name)** | **Botanical Name**  **(Scientific Name with author citation)** | **Family** | **No. of Plants** | **Number of plots in which species occurred** | **Relative Density of species** | **Relative frequency** | **Relative abundance** | **Herbarium number** |
| --- | --- | --- | --- | --- | --- | --- | --- | --- | --- |
| 1 | Chaff flower | Achyranthes asperaL. | Amaranthaceae | 5 | 3 | 7.462 | 8.571 | 16.034 | LPABFSGC001 |
| 2 | Turkey berry | *Solanum taruum* Sw. | Apocynaceae | 2 | 1 | 2.985 | 2.857 | 5.842 | LPABFSGC002 |
| 3 | Tridax mallow | *Tridax procumbens* L. | Asteraceae | 5 | 2 | 7.462 | 5.714 | 13.176 | LPABFSGC003 |
| 4 | Congress grass | *Parthenium hysterophorus* L. | Asteraceae | 8 | 4 | 11.940 | 11.428 | 23.368 | LPABFSGC004 |
| 5 | Puncture vine | *Tribulus terrestris* L. | Euphordiaceae | 4 | 3 | 5.970 | 8.571 | 14.541 | LPABFSGC005 |
| 6 | Needle bush | *Vachellia farnesiana* (L.) Wight & Arn. | Fabaceae | 5 | 3 | 7.462 | 8.571 | 16.034 | LPABFSGC006 |
| 7 | Holy basil | *Osmium sanctum* L. | Lamiaceae | 5 | 2 | 7.462 | 5.714 | 13.176 | LPABFSGC007 |
| 8 | Sweet basil | *Ocimum basilicum* L. | Lamiaceae | 2 | 1 | 2.985 | 2.857 | 5.842 | LPABFSGC008 |
| 9 | Indian mallow | *Abutilon indicum* (L.) Sweet. | Malvaceae | 4 | 2 | 5.970 | 5.714 | 11.684 | LPABFSGC009 |
| 10 | Desho grass | *Pennisetum pedicellatum* Trin. | Poaceae | 7 | 4 | 10.447 | 11.428 | 21.876 | LPABFSGC010 |
| 11 | Ziziphus | *Ziziphus mauritiana*Lam. | Rhamnaceae | 4 | 2 | 5.970 | 5.714 | 11.684 | LPABFSGC011 |
| 12 | Hap bush | *Dodonaea viscosa* (L.)Jacq. | Sapindaceae | 3 | 1 | 4.477 | 2.857 | 7.334 | LPABFSGC012 |
| 13 | Soap nut | *Litchi chinensis* Sonn. | Sapindaceae | 2 | 1 | 2.985 | 2.857 | 5.842 | LPABFSGC013 |
| 14 | Carry me seed | *Phyllanthus amarus*Schumach. & Thonn. | Solanaceae | 4 | 3 | 5.970 | 8.571 | 14.541 | LPABFSGC014 |
| 15 | Lantana | *Lantana camara* L. | Verbinaceae | 7 | 3 | 10.447 | 8.571 | 19.019 | LPABFSGC015 |

**Table 2: Phytosociological status of plants species found at moderately planted area of Basapura forest**

| **Sl No** | **Plant Name (vernacular name/Local Name)** | **Botanical Name**  **(Scientific Name with author citation)** | **Family** | **No. of Plants** | **Number of plots in which species occurred** | **Relative density of species** | **Relative frequency** | **Relative abundance** | **Herbarium number** |
| --- | --- | --- | --- | --- | --- | --- | --- | --- | --- |
| 1 | Sisal | *Agave americana* L. | Agavaceae | 2 | 2 | 1.801 | 3.571 | 5.373 | MPABFSGC001 |
| 2 | Khaki weed | *Alternanthera caracasana* Kunth. | Amaranthaceae | 3 | 2 | 2.702 | 3.571 | 6.274 | MPABFSGC002 |
| 3 | Custard apple | *Annona reticulata* L. | Annonaceae | 2 | 1 | 1.801 | 1.785 | 3.587 | MPABFSGC003 |
| 4 | Fever few | *Tanacetum parthenium* L. | Asteraceae | 4 | 2 | 3.603 | 3.571 | 7.175 | MPABFSGC004 |
| 5 | Congress grass | *Parthenium hysterophorus* L. | Asteraceae | 2 | 1 | 1.801 | 1.785 | 3.587 | MPABFSGC005 |
| 6 | Asthma plant | *Euphorbia hirta* L. | Euphorbiaceae | 5 | 2 | 4.504 | 3.571 | 8.075 | MPABFSGC006 |
| 7 | Caster | *Ricinus communis* L. | Euphorbiaceae | 2 | 1 | 1.801 | 1.785 | 3.587 | MPABFSGC007 |
| 8 | Ear leaf acacia | *Acacia auriculiformis* Benth. | Fabaceae | 5 | 3 | 4.504 | 5.357 | 9.861 | MPABFSGC008 |
| 9 | Kachnar | *Bauhinia variegata* L. | Fabaceae | 3 | 2 | 2.702 | 3.571 | 6.274 | MPABFSGC009 |
| 10 | Bidi leaf tree | *Bauhinia racemosa* Lam. | Fabaceae | 5 | 3 | 4.504 | 5.357 | 9.861 | MPABFSGC010 |
| 11 | Indian beech | *Pongamia pinnata* (L.). Pierre. | Fabaceae | 4 | 3 | 3.603 | 5.357 | 8.960 | MPABFSGC011 |
| 12 | Needle bush | *Vachellia fernesiana* (L.) Wight & Arn. | Fabaceae | 6 | 3 | 5.405 | 5.357 | 10.762 | MPABFSGC012 |
| 13 | Gum Arabic tree | *Senegalia senegal* (L.) Britton. | Fabaceae | 4 | 2 | 3.603 | 3.571 | 7.175 | MPABFSGC013 |
| 14 | Desho grass | *Pennisetum pedicellatum* Trin. | Poaceae | 3 | 1 | 2.702 | 1.785 | 4.488 | MPABFSGC014 |
| 15 | White lead tree | *Leucaena keucocephala* | Fabaceae | 3 | 1 | 2.702 | 1.785 | 4.488 | MPABFSGC015 |
| 16 | Gum Arabic tree | *Vachellia nilotica* (L.) Delile | Fabaceae | 2 | 1 | 1.801 | 1.785 | 3.587 | MPABFSGC016 |
| 17 | Holy basil | *Ocimum basilicum* L. | Lamiaceae | 3 | 1 | 2.702 | 1.785 | 4.488 | MPABFSGC017 |
| 18 | Tulsi | *Ocimum sanctum* L | Lamiaceae | 3 | 1 | 2.702 | 1.785 | 4.488 | MPABFSGC018 |
| 19 | Florida hopbuh | *Dodonaea viscosa* (L.)Jacq. | Sapindaceae | 3 | 2 | 2.702 | 3.571 | 6.274 | MPABFSGC019 |
| 20 | Indian mellow | *Abutilon indicum* (L.) Sweet | Malvaceae | 2 | 1 | 1.801 | 1.785 | 3.587 | MPABFSGC020 |
| 21 | Banyan tree | *Ficus bengaliensis* L. | Moraceae | 5 | 2 | 4.504 | 3.571 | 8.075 | MPABFSGC021 |
| 22 | Soft fig tree | *Ficus carica* L. | Moraceae | 3 | 1 | 2.702 | 1.785 | 4.488 | MPABFSGC022 |
| 23 | Indian berry | *Muntingia calabura* L. | Muntingiaceae | 3 | 2 | 2.702 | 3.571 | 6.274 | MPABFSGC023 |
| 24 | Southern blue gum | *Eucalyptus globulus* Labill. | Myrtaceae | 3 | 1 | 2.702 | 1.785 | 4.488 | MPABFSGC024 |
| 25 | Parrot olax | *Olax scandens* Roxb. | Olacaceae | 3 | 1 | 2.702 | 1.785 | 4.488 | MPABFSGC025 |
| 26 | Oxalis | *Biophytum sensitium* (L.) DC. | Oxilidaceae | 2 | 1 | 1.801 | 1.785 | 3.587 | MPABFSGC026 |
| 27 | Water hyssop | *Bacopa monnieri* (L.) Pennell | Plantaginaceae | 2 | 1 | 1.801 | 1.785 | 3.587 | MPABFSGC027 |
| 28 | Throny bamboo | *Bambusa bambos* (L.) Voss. | Poaceae | 3 | 2 | 2.702 | 3.571 | 6.274 | MPABFSGC028 |
| 29 | Golden seal | *Hydrastis canadensis* L. | Ranunculaceae | 2 | 1 | 1.801 | 1.785 | 3.587 | MPABFSGC029 |
| 30 | Mimosa bush | *Mimosa pudica* L. | Fabaceae | 6 | 3 | 5.405 | 5.3571 | 10.766 | MPABFSGC030 |
| 31 | Sandalwood | *Santalum album* L. | Santalaceae | 4 | 2 | 3.603 | 3.571 | 7.175 | MPABFSGC031 |
| 32 | Soap nut | *Litchi chinensis* Sonn. | Sapindaceae | 2 | 1 | 1.801 | 1.785 | 3.587 | MPABFSGC032 |
| 33 | Turkey berry | *Solanum torvum* Sw. | Solanaceae | 3 | 1 | 2.702 | 1.785 | 4.488 | MPABFSGC033 |
| 34 | Lantana | *Lantana camara* L. | Verbenaceae | 4 | 2 | 3.603 | 3.571 | 7.175 | MPABFSGC034 |

**Table 3: Phytosociological status of plants species found at densely planted area of Basapura forest**

| **Sl No** | **Plant Name (vernacular name/Local Name)** | **Botanical Name**  **(Scientific Name with author citation)** | **Family** | **No. of Plants** | **Number of plots in which species occurred** | **Relative density of species** | **Relative frequency** | **Relative abundance** | **Herbarium number** |
| --- | --- | --- | --- | --- | --- | --- | --- | --- | --- |
| 1 | Adathoda vasica | *Justicia adhatida* L. | Acanthaceae | 6 | 2 | 5.405 | 3.225 | 8.631 | DPABFSGC001 |
| 2 | Devils tripet | *Achyranthes aspera* L. | Amaranthaceae | 4 | 2 | 3.603 | 3.225 | 6.829 | DPABFSGC002 |
| 3 | Bullock heart | *Annona reticulate* L. | Annonaceae | 3 | 2 | 2.702 | 3.225 | 5.928 | DPABFSGC003 |
| 4 | Milk weed | *Asclepias syriaca* L. | Apocynaceae | 2 | 1 | 1.801 | 1.612 | 3.414 | DPABFSGC004 |
| 5 | Parthenium grass | *Parthenium hysterophus* L. | Asteraceae | 10 | 4 | 9.009 | 6.451 | 15.460 | DPABFSGC005 |
| 6 | Prickly pear | *Opentia littoralis* (Engelm.) Cockerell | Cactaceae | 4 | 2 | 3.603 | 3.225 | 6.829 | DPABFSGC006 |
| 7 | Tendu leaf tree | *Diospyrus melanoxylon* Roxb. | Ebenaceae | 3 | 1 | 2.702 | 1.612 | 4.315 | DPABFSGC007 |
| 8 | Krishanasiris | *Albizia amara* (Roxb.) Willd. | Fabaceae | 3 | 2 | 2.702 | 3.225 | 5.928 | DPABFSGC008 |
| 9 | Kachnar | *Bauhinia variegata* L. | Fabaceae | 9 | 4 | 8.108 | 6.451 | 14.559 | DPABFSGC009 |
| 10 | Honge tree | *Pongemia pinnate* (L.). Pierre. | Fabaceae | 8 | 4 | 7.207 | 6.451 | 13.658 | DPABFSGC010 |
| 11 | Bidi leaf tree | *Bauhinia racemosa* Lam. | Fabaceae | 1 | 1 | 0.900 | 1.612 | 2.513 | DPABFSGC011 |
| 12 | Ear leaf tree | *Acacia auriculiformis* Benth. | Fabaceae | 3 | 1 | 2.702 | 1.612 | 4.315 | DPABFSGC012 |
| 13 | Quick stick | *Gliricida sepium* (Jacq) Kunth. | Fabaceae | 2 | 1 | 1.801 | 1.612 | 3.414 | DPABFSGC013 |
| 14 | Cutch tree | *Senegalla catechu* (L.f.) Willd. | Fabaceae | 3 | 1 | 2.702 | 1.612 | 4.315 | DPABFSGC014 |
| 15 | Rain tree | *Samomea saman* (Jacq.) Merr. | Fabaceae | 4 | 2 | 3.603 | 3.225 | 6.829 | DPABFSGC015 |
| 16 | White lead tree | *Leucaena leucucephala* (Lam.) De Wit. | Fabaceae | 1 | 1 | 0.900 | 1.612 | 2.513 | DPABFSGC016 |
| 17 | Holy basil | *Ocimum basilicum* L. | Lamiaceae | 3 | 2 | 2.702 | 3.225 | 5.928 | DPABFSGC017 |
| 18 | Sweet basil | *Ocimum sanctum* L | Lamiaceae | 2 | 1 | 1.801 | 1.612 | 3.414 | DPABFSGC018 |
| 19 | Teak wood | *Tectona grandis* L.f. | Lamiaceae | 1 | 1 | 0.900 | 1.612 | 2.513 | DPABFSGC019 |
| 20 | Pomegranate | *Punica granatum* L. | Lythraceae | 5 | 2 | 4.504 | 3.225 | 7.730 | DPABFSGC020 |
| 21 | Mimosa bush | *Mimosa pudica* L. | Fabaceae | 2 | 1 | 1.801 | 1.612 | 3.414 | DPABFSGC021 |
| 22 | Cluster fig tree | *Ficus racemosa* L. | Moraceae | 9 | 3 | 8.108 | 4.838 | 12.948 | DPABFSGC022 |
| 23 | Parrot vlax | *Olaxs candens* Roxb. | Olacaceae | 3 | 2 | 2.702 | 3.225 | 5.928 | DPABFSGC023 |
| 24 | Mexial prickly | *Argemone maxicana* L. | Papaveraceae | 1 | 1 | 0.900 | 1.612 | 2.513 | DPABFSGC024 |
| 25 | Male bamboo | *Dendrocalamus atrictus* (Roxb.) Nees. | Poaceae | 2 | 1 | 1.801 | 1.612 | 3.414 | DPABFSGC025 |
| 26 | Throny bamboo | *Bambus abambos* (L.) Voss. | Poaceae | 12 | 6 | 10.810 | 9.677 | 20.488 | DPABFSGC026 |
| 27 | Silver oak | *Grevillea robusta* A.Cunn. ex R.Br. | Proteaceae | 1 | 1 | 0.900 | 1.612 | 2.513 | DPABFSGC027 |
| 28 | Zizapus | *Zizapus mauritiana (*L.) Lam. | Rhamnaceae | 1 | 1 | 0.900 | 1.612 | 2.513 | DPABFSGC028 |
| 29 | Sandal wood | *Santalum album* L. | Santalaceae | 12 | 5 | 10.810 | 8.064 | 18.875 | DPABFSGC029 |
| 30 | Hop bush | *Dodonaea viscosa* (L.)Jacq. | Sapindaceae | 1 | 1 | 0.900 | 1.612 | 2.513 | DPABFSGC030 |
| 31 | Turkey berry | *Solanum torvum* Sw. | Solanaceae | 2 | 1 | 1.801 | 1.612 | 3.414 | DPABFSGC031 |
| 32 | Lantana | *Lantana camara* L. | Verbenaceae | 3 | 2 | 2.702 | 3.225 | 5.928 | DPABFSGC032 |

Table 4: Ecological Index value for all the sites of Basapur Forest Koppal district

| **Sl. No.** | **Ecological Parameters** | **Biodiversity Index Value** | | |
| --- | --- | --- | --- | --- |
| **Less planted area** | **Moderately planted area** | **Densely planted area** |
| 1 | Simpson Index | 0.063 | 0.024 | 0.0444 |
| 2 | Dominance Index | 0.937 | 0.975 | 0.956 |
| 3 | Reciprocal Simpson Index | 15.800 | 40.973 | 22.500 |
| 4 | Shannon Index | 3.790 | 4.999 | 4.580 |
| 5 | Menhinick Index | 1.830 | 3.227 | 2.850 |
| 6 | Buzas and Gibson's Index | 0.922 | 0.940 | 0.750 |
| 7 | Equitability Index | 0.970 | 0.982 | 0.917 |
| 8 | Berger-Parker Dominance Index | 0.119 | 0.054 | 0.095 |
| 9 | Margalef Richness Index | 3.330 | 7.007 | 6.410 |
| 10 | Gini Coefficient | 0.221 | 0.192 | 0.415 |
